# Supplementary material for: Natural variation in a single amino acid substitution underlies physiological responses to topoisomerase II poisons
Source: PLoS Genet. 2017 Jul 12;13(7):e1006891. doi: 10.1371/journal.pgen.1006891 (PMC5529024; doi:10.1371/journal.pgen.1006891)
Supplement: S2 Table — Processed phenotype data of RIAILs in the presence of amsacrine or etoposide used to perform linkage mapping. (CSV) [file pgen.1006891.s013.csv]

condition	strain	trait	phenotype
etoposide	QX318	median.TOF	5.32537174705472
etoposide	QX89	median.TOF	-20.0320809605461
etoposide	QX184	median.TOF	-39.8291443423643
etoposide	QX297	median.TOF	8.83080032961398
etoposide	QX267	median.TOF	-8.54442766975009
etoposide	QX218	median.TOF	-19.1347181535478
etoposide	QX137	median.TOF	-12.0123857348168
etoposide	QX364	median.TOF	3.9934684368334
etoposide	QX171	median.TOF	-56.5993633746165
etoposide	QX112	median.TOF	-9.60734583887555
etoposide	QX250	median.TOF	-28.6241754091392
etoposide	N2	median.TOF	34.7087080026998
etoposide	QX299	median.TOF	10.8635007145191
etoposide	QX311	median.TOF	-22.0108024533782
etoposide	QX358	median.TOF	-17.081796441496
etoposide	QX269	median.TOF	47.9794942673327
etoposide	QX511	median.TOF	17.6896947100804
etoposide	QX174	median.TOF	47.6912551586567
etoposide	QX172	median.TOF	-22.2856897514997
etoposide	QX314	median.TOF	-6.53322317814914
etoposide	QX92	median.TOF	-33.7926195463713
etoposide	QX565	median.TOF	-15.2247144701735
etoposide	QX313	median.TOF	-18.0471463272013
etoposide	QX290	median.TOF	-45.171035489326
etoposide	QX114	median.TOF	13.3946636433054
etoposide	QX76	median.TOF	-46.0188898196265
etoposide	QX72	median.TOF	-23.0695163266737
etoposide	QX304	median.TOF	-29.8546821924879
etoposide	QX448	median.TOF	0.225956581394206
etoposide	QX97	median.TOF	-30.4055168638655
etoposide	QX557	median.TOF	-23.867632498851
etoposide	QX57	median.TOF	18.8551798112674
etoposide	QX534	median.TOF	-13.1862589452892
etoposide	QX468	median.TOF	4.0467538485406
etoposide	CB4856	median.TOF	-21.5603213172537
etoposide	QX243	median.TOF	5.01001150681606
etoposide	QX417	median.TOF	2.87806961949169
etoposide	QX2	median.TOF	-36.60488355129
etoposide	QX503	median.TOF	8.65118372073135
etoposide	QX451	median.TOF	-2.42505400028713
etoposide	QX307	median.TOF	115.537526207518
etoposide	QX453	median.TOF	-26.1261620584579
etoposide	QX416	median.TOF	23.0899885335058
etoposide	QX561	median.TOF	4.52614805267666
etoposide	QX475	median.TOF	15.7691912663594
etoposide	QX77	median.TOF	-6.65731324567523
etoposide	QX437	median.TOF	-2.83000005968628
etoposide	QX382	median.TOF	-2.29534994539153
etoposide	QX482	median.TOF	-55.6410147781429
etoposide	QX352	median.TOF	40.8514289583402
etoposide	QX108	median.TOF	39.417049793645
etoposide	QX132	median.TOF	72.7255147401012
etoposide	QX51	median.TOF	18.4159304089043
etoposide	QX420	median.TOF	-11.6143186525269
etoposide	QX418	median.TOF	17.8915236850904
etoposide	QX426	median.TOF	1.95942876128821
etoposide	QX278	median.TOF	-21.2032783296607
etoposide	QX158	median.TOF	-0.960464310300671
etoposide	QX506	median.TOF	19.6820829820989
etoposide	QX37	median.TOF	-25.6281943735011
etoposide	QX529	median.TOF	-23.3121176990635
etoposide	CB4856	median.TOF	-11.9823767652025
etoposide	QX553	median.TOF	54.8650957375267
etoposide	QX245	median.TOF	42.1511837207314
etoposide	QX487	median.TOF	14.6614153696433
etoposide	QX404	median.TOF	-21.843974229187
etoposide	N2	median.TOF	6.24614336882744
etoposide	QX306	median.TOF	-48.5377060392088
etoposide	QX491	median.TOF	40.1426381337904
etoposide	QX279	median.TOF	35.1453178075121
etoposide	QX153	median.TOF	42.6506917030648
etoposide	QX315	median.TOF	-7.48839347017633
etoposide	QX521	median.TOF	4.00826569205388
etoposide	QX492	median.TOF	13.8831910402697
etoposide	QX402	median.TOF	-30.8816066683517
etoposide	QX192	median.TOF	0.622041559732322
etoposide	QX91	median.TOF	-41.5529294951717
etoposide	QX456	median.TOF	-11.171209152567
etoposide	QX166	median.TOF	-11.7758245505389
etoposide	QX413	median.TOF	-10.2140019962392
etoposide	QX563	median.TOF	-23.546425410362
etoposide	QX15	median.TOF	-23.5761941956956
etoposide	QX49	median.TOF	62.3531703290864
etoposide	QX39	median.TOF	-51.1221985585605
etoposide	QX465	median.TOF	15.3550217219597
etoposide	QX58	median.TOF	-38.3159303685824
etoposide	QX372	median.TOF	-2.73326005711452
etoposide	QX449	median.TOF	-0.0220186865481915
etoposide	QX20	median.TOF	-19.7628389270048
etoposide	QX334	median.TOF	-12.7682010809885
etoposide	QX378	median.TOF	-34.6194288806608
etoposide	QX442	median.TOF	-3.3874215611224
etoposide	QX411	median.TOF	32.828964510674
etoposide	QX497	median.TOF	28.8250010107764
etoposide	QX383	median.TOF	-16.0453177671903
etoposide	QX435	median.TOF	56.4452809285467
etoposide	QX371	median.TOF	9.08527638514551
etoposide	QX540	median.TOF	15.3104164691437
etoposide	QX321	median.TOF	14.2862380955777
etoposide	QX336	median.TOF	3.15118372073136
etoposide	QX333	median.TOF	-25.6035949859484
etoposide	QX444	median.TOF	6.18604648199635
etoposide	QX213	median.TOF	13.3438172303588
etoposide	QX17	median.TOF	11.9658867244107
etoposide	QX270	median.TOF	10.5037390694748
etoposide	QX33	median.TOF	1.50440926101559
etoposide	QX55	median.TOF	1.72394709921326
etoposide	QX432	median.TOF	25.7297894368306
etoposide	QX98	median.TOF	25.3053062410098
etoposide	QX187	median.TOF	-20.7709314800087
etoposide	QX272	median.TOF	-19.2839328068203
etoposide	QX42	median.TOF	-9.46442781019807
etoposide	QX220	median.TOF	-22.5000736000441
etoposide	QX204	median.TOF	4.77435167086689
etoposide	QX332	median.TOF	8.18295024667685
etoposide	QX254	median.TOF	39.6206709918814
etoposide	QX421	median.TOF	-0.0596393841438881
etoposide	QX406	median.TOF	-8.59701989745888
etoposide	QX88	median.TOF	-2.53594183560035
etoposide	QX480	median.TOF	4.29894379949053
etoposide	QX528	median.TOF	-15.1373665500589
etoposide	QX127	median.TOF	-52.2182565070511
etoposide	QX275	median.TOF	-4.51148438648807
etoposide	QX484	median.TOF	-18.4976002211654
etoposide	QX597	median.TOF	2.44012052403925
etoposide	QX75	median.TOF	12.5456462053689
etoposide	QX438	median.TOF	7.78088777562695
etoposide	QX160	median.TOF	-24.4174422723057
etoposide	QX496	median.TOF	24.3101482910915
etoposide	QX520	median.TOF	21.9226748723078
etoposide	QX53	median.TOF	-26.3215326143829
etoposide	QX165	median.TOF	82.4396786827463
etoposide	QX459	median.TOF	24.9947880508532
etoposide	QX476	median.TOF	10.658543522863
etoposide	QX337	median.TOF	18.0402958854181
etoposide	QX452	median.TOF	-17.9550747114704
etoposide	QX397	median.TOF	-66.1862589452891
etoposide	QX554	median.TOF	25.9791235310548
etoposide	QX41	median.TOF	23.1200092446891
etoposide	QX175	median.TOF	-3.23526953929547
etoposide	QX559	median.TOF	-38.4335398344369
etoposide	QX348	median.TOF	41.1130592639
etoposide	CB4856	median.TOF	-27.6833149924966
etoposide	CB4856	median.TOF	-8.22008506706208
etoposide	QX588	median.TOF	-34.9980967494654
etoposide	QX341	median.TOF	-18.9099886336319
etoposide	QX430	median.TOF	-25.4776646168422
etoposide	QX115	median.TOF	-4.07152580885468
etoposide	QX65	median.TOF	-49.9715984743439
etoposide	QX373	median.TOF	35.4457227698397
etoposide	QX295	median.TOF	-2.51439521699775
etoposide	QX104	median.TOF	20.2620715560446
etoposide	QX429	median.TOF	28.4584559185992
etoposide	QX463	median.TOF	41.2837203435277
etoposide	QX45	median.TOF	-17.7858868245368
etoposide	QX322	median.TOF	6.7589083090047
etoposide	QX393	median.TOF	-8.77649474207972
etoposide	QX386	median.TOF	-7.94899164064752
etoposide	QX85	median.TOF	-31.9899767516149
etoposide	QX326	median.TOF	-15.6834892673893
etoposide	QX84	median.TOF	-8.94387021986949
etoposide	QX485	median.TOF	26.520719470117
etoposide	QX436	median.TOF	1.61442983175091
etoposide	QX355	median.TOF	60.4826934618121
etoposide	QX101	median.TOF	20.0637804918414
etoposide	QX154	median.TOF	71.0644506833822
etoposide	QX117	median.TOF	26.2747935121599
etoposide	QX380	median.TOF	68.7185849452297
etoposide	QX135	median.TOF	13.6659809759518
etoposide	QX176	median.TOF	-0.103594985948385
etoposide	QX266	median.TOF	-21.400422887934
etoposide	QX328	median.TOF	-4.63377378643933
etoposide	QX325	median.TOF	-26.7859096573991
etoposide	QX47	median.TOF	3.50373906947476
etoposide	QX162	median.TOF	-9.79823353374079
etoposide	QX190	median.TOF	-25.9846145976313
etoposide	QX574	median.TOF	-27.2173546680418
etoposide	QX16	median.TOF	20.700020651497
etoposide	QX360	median.TOF	-16.2409107688254
etoposide	QX473	median.TOF	-38.5961413472746
etoposide	QX467	median.TOF	63.9658867244107
etoposide	QX148	median.TOF	-3.22564832913311
etoposide	QX149	median.TOF	57.805042573591
etoposide	QX121	median.TOF	8.91009981285594
etoposide	QX164	median.TOF	20.2221777088492
etoposide	QX517	median.TOF	-0.484122579964709
etoposide	QX173	median.TOF	-8.01353285239846
etoposide	QX27	median.TOF	-8.43446256347923
etoposide	QX13	median.TOF	6.60322534014996
etoposide	QX253	median.TOF	19.3850196002808
etoposide	QX274	median.TOF	32.7911584082683
etoposide	QX161	median.TOF	-15.3678961662698
etoposide	QX477	median.TOF	-21.6725367016381
etoposide	QX240	median.TOF	8.40200725985209
etoposide	QX408	median.TOF	-43.614586830579
etoposide	QX349	median.TOF	4.06559290098524
etoposide	QX66	median.TOF	-41.6017664259373
etoposide	QX180	median.TOF	-29.5267078424509
etoposide	QX374	median.TOF	103.694154738278
etoposide	QX394	median.TOF	-17.3981452277009
etoposide	QX188	median.TOF	-21.1196808065105
etoposide	QX242	median.TOF	-42.2135099785726
etoposide	QX62	median.TOF	-31.3289634201944
etoposide	QX439	median.TOF	20.8778014414395
etoposide	QX494	median.TOF	-4.80671252630012
etoposide	QX244	median.TOF	44.6408349464524
etoposide	QX474	median.TOF	15.6426381337904
etoposide	QX9	median.TOF	-17.8734984120702
etoposide	QX207	median.TOF	-0.127532626308785
etoposide	QX293	median.TOF	1.02122773998603
etoposide	QX183	median.TOF	-12.1646730478069
etoposide	QX523	median.TOF	23.4508441906178
etoposide	QX526	median.TOF	5.48308703095226
etoposide	QX490	median.TOF	11.033562707621
etoposide	QX560	median.TOF	-26.6562056025035
etoposide	QX227	median.TOF	-20.7332600571145
etoposide	QX11	median.TOF	-32.6951857766568
etoposide	N2	median.TOF	43.7994520693596
etoposide	QX26	median.TOF	10.8653476633764
etoposide	QX134	median.TOF	44.5637415081119
etoposide	QX361	median.TOF	-43.0057084774468
etoposide	QX83	median.TOF	21.6144298317509
etoposide	QX376	median.TOF	-7.72184927067059
etoposide	QX113	median.TOF	-20.455035727741
etoposide	QX271	median.TOF	5.80504257359102
etoposide	QX350	median.TOF	-38.0354610105779
etoposide	QX594	median.TOF	24.1623882123323
etoposide	QX118	median.TOF	11.6538036416619
etoposide	QX273	median.TOF	-29.3591976851498
etoposide	QX531	median.TOF	-18.114957566857
etoposide	QX513	median.TOF	-17.659798366123
etoposide	QX261	median.TOF	-12.955035727741
etoposide	QX288	median.TOF	3.1509200533126
etoposide	QX22	median.TOF	-25.7328182158215
etoposide	QX385	median.TOF	-20.0368042001996
etoposide	N2	median.TOF	31.4782449808706
etoposide	QX539	median.TOF	-5.96067695727091
etoposide	QX579	median.TOF	-28.1710354893261
etoposide	QX181	median.TOF	-20.398784142031
etoposide	QX125	median.TOF	28.0523560943411
etoposide	QX441	median.TOF	-35.3217389092259
etoposide	QX370	median.TOF	-29.399926359634
etoposide	QX93	median.TOF	14.383911957109
etoposide	QX339	median.TOF	6.35414317177545
etoposide	QX479	median.TOF	-8.26331975202728
etoposide	QX217	median.TOF	19.8233622648734
etoposide	CB4856	median.TOF	-24.1637944976226
etoposide	QX95	median.TOF	27.0147236551763
etoposide	QX54	median.TOF	-4.5952740826967
etoposide	QX362	median.TOF	-19.0786956955431
etoposide	QX570	median.TOF	-1.94113982084924
etoposide	QX340	median.TOF	7.67761166829513
etoposide	QX284	median.TOF	-3.0039116422361
etoposide	CB4856	median.TOF	12.7725158519267
etoposide	QX319	median.TOF	-42.0284881969266
etoposide	QX498	median.TOF	62.1164164810696
etoposide	QX434	median.TOF	-9.07152580885468
etoposide	QX298	median.TOF	16.2295493450137
etoposide	QX25	median.TOF	-23.2478015799675
etoposide	QX82	median.TOF	-42.4316928855795
etoposide	QX44	median.TOF	-8.14323690729405
etoposide	QX69	median.TOF	-6.17663773512664
etoposide	QX483	median.TOF	13.885042433143
etoposide	QX508	median.TOF	-34.4588483972599
etoposide	QX585	median.TOF	-15.090342028437
etoposide	QX231	median.TOF	-35.2962240515598
etoposide	QX447	median.TOF	-11.1539605738726
etoposide	QX384	median.TOF	-13.8831078806636
etoposide	QX469	median.TOF	-20.3864487184334
etoposide	QX584	median.TOF	-18.1015855037674
etoposide	QX170	median.TOF	-16.9492598186997
etoposide	QX103	median.TOF	-0.58493685567366
etoposide	QX283	median.TOF	48.4434777412088
etoposide	QX461	median.TOF	0.137706079530707
etoposide	CB4856	median.TOF	-39.1463488458911
etoposide	QX335	median.TOF	35.5100232483851
etoposide	CB4856	median.TOF	-7.92365495685574
etoposide	QX202	median.TOF	-1.63921794293217
etoposide	QX481	median.TOF	21.2144839117411
etoposide	QX309	median.TOF	17.3061847911941
etoposide	QX580	median.TOF	50.1067952709072
etoposide	QX296	median.TOF	-36.9306172623581
etoposide	QX409	median.TOF	-18.4657983780489
etoposide	QX365	median.TOF	11.9947997924223
etoposide	QX237	median.TOF	-31.8864487184334
etoposide	QX4	median.TOF	0.975262656000593
etoposide	QX550	median.TOF	40.5431284533189
etoposide	QX316	median.TOF	9.62764380553279
etoposide	QX343	median.TOF	37.2629272733666
etoposide	QX189	median.TOF	-7.06927233587527
etoposide	QX43	median.TOF	35.9213043044569
etoposide	QX427	median.TOF	-40.2325781240047
etoposide	QX347	median.TOF	29.1623882123323
etoposide	QX24	median.TOF	19.1748419903954
etoposide	QX194	median.TOF	33.6632667625166
etoposide	QX102	median.TOF	-49.8123376049629
etoposide	QX248	median.TOF	11.4215326547047
etoposide	QX107	median.TOF	-1.30047136616957
etoposide	QX90	median.TOF	6.02682998578651
etoposide	QX79	median.TOF	19.8297247063926
etoposide	QX193	median.TOF	50.8513734938757
etoposide	QX196	median.TOF	27.7008992016813
etoposide	QX80	median.TOF	11.7593345097471
etoposide	QX525	median.TOF	37.5644506833822
etoposide	QX377	median.TOF	-17.9962452899746
etoposide	QX500	median.TOF	-28.0596393841439
etoposide	QX405	median.TOF	-35.4464901408
etoposide	QX206	median.TOF	-0.25391209563703
etoposide	QX323	median.TOF	14.2085109296627
etoposide	QX236	median.TOF	-16.0096948102065
etoposide	QX286	median.TOF	5.99612734149335
etoposide	QX407	median.TOF	-3.71937589179181
etoposide	QX454	median.TOF	17.9517512163825
etoposide	QX495	median.TOF	11.8426867543248
etoposide	QX14	median.TOF	-8.6778870215888
etoposide	QX450	median.TOF	-42.1974634368899
etoposide	QX163	median.TOF	2.808194273375
etoposide	CB4856	median.TOF	-34.2406654902529
etoposide	QX312	median.TOF	-29.2897087158616
etoposide	QX598	median.TOF	-11.4299470708173
etoposide	QX331	median.TOF	-21.3869407361
etoposide	QX133	median.TOF	16.2638291123758
etoposide	QX472	median.TOF	-19.3864487184334
etoposide	QX556	median.TOF	2.2290685199913
etoposide	QX74	median.TOF	13.0243122337365
etoposide	QX178	median.TOF	-5.86675394866673
etoposide	QX392	median.TOF	19.1011930251067
etoposide	QX412	median.TOF	-15.8461573746087
etoposide	QX390	median.TOF	-7.28142679633937
etoposide	QX78	median.TOF	11.5906502806981
etoposide	QX280	median.TOF	8.64332006690021
etoposide	QX310	median.TOF	-14.6666825299879
etoposide	N2	median.TOF	22.8287518637036
etoposide	QX354	median.TOF	27.1860464819964
etoposide	QX396	median.TOF	-28.5961413472746
etoposide	QX400	median.TOF	70.8117642041323
etoposide	QX366	median.TOF	-22.7332600571145
etoposide	QX527	median.TOF	-14.9299470708173
etoposide	QX294	median.TOF	52.6262732376819
etoposide	QX368	median.TOF	-28.2305686418237
etoposide	QX327	median.TOF	-43.0445902030737
etoposide	QX356	median.TOF	-7.84217739397626
etoposide	QX265	median.TOF	18.1372095512307
etoposide	QX387	median.TOF	42.2364993258028
etoposide	QX263	median.TOF	4.261137697085
etoposide	QX329	median.TOF	8.49699538352869
etoposide	QX38	median.TOF	-41.5031907253968
etoposide	QX324	median.TOF	-3.10262214325935
etoposide	QX282	median.TOF	-11.0509526445929
etoposide	QX71	median.TOF	-15.7202431563697
etoposide	QX478	median.TOF	21.7929479845499
etoposide	QX346	median.TOF	-6.26328076829783
etoposide	QX596	median.TOF	-22.4599677820006
etoposide	N2	median.TOF	3.44012052403925
etoposide	QX381	median.TOF	18.5985021004964
etoposide	QX457	median.TOF	29.06270486862
etoposide	QX136	median.TOF	-33.4514819478509
etoposide	QX433	median.TOF	89.9490473554071
etoposide	QX61	median.TOF	8.59561361216854
etoposide	N2	median.TOF	22.1032025072877
etoposide	QX144	median.TOF	-0.955035727740981
etoposide	QX281	median.TOF	-30.832273209286
etoposide	QX300	median.TOF	-5.37890280737619
etoposide	QX264	median.TOF	23.1189016015174
etoposide	QX5	median.TOF	-10.1646730478069
etoposide	QX111	median.TOF	11.7048627015787
etoposide	QX159	median.TOF	9.61442983175091
etoposide	QX379	median.TOF	-16.2144438375322
etoposide	QX583	median.TOF	-13.0388254239496
etoposide	QX501	median.TOF	-5.99222632561272
etoposide	QX353	median.TOF	143.899135413072
etoposide	QX124	median.TOF	-0.440887894999512
etoposide	QX182	median.TOF	-3.05655489039341
etoposide	QX471	median.TOF	-31.7858868245368
etoposide	QX424	median.TOF	32.1502498617718
etoposide	N2	median.TOF	6.93474662848661
etoposide	QX464	median.TOF	2.63211557529926
etoposide	QX120	median.TOF	14.1003373077847
etoposide	N2	median.TOF	25.0411189711379
etoposide	QX40	median.TOF	-17.0172837053256
etoposide	QX302	median.TOF	-60.8499700441276
etoposide	QX303	median.TOF	1.72149577573934
etoposide	QX234	median.TOF	2.31825654737291
etoposide	QX68	median.TOF	19.3912835932736
etoposide	QX320	median.TOF	-12.7137619044223
etoposide	QX138	median.TOF	46.9706332528892
etoposide	QX530	median.TOF	-30.5097274418087
etoposide	QX398	median.TOF	-17.4232026074138
etoposide	QX203	median.TOF	-62.7594817098353
etoposide	QX395	median.TOF	-17.8949943053744
etoposide	QX419	median.TOF	-34.2870290421398
etoposide	QX443	median.TOF	-8.9113592014828
etoposide	QX59	median.TOF	-31.897905135884
etoposide	QX70	median.TOF	44.5683071144205
etoposide	QX545	median.TOF	-17.2861549359715
etoposide	QX587	median.TOF	45.0421216583149
etoposide	QX34	median.TOF	53.4988869733497
etoposide	QX276	median.TOF	29.0044892191501
etoposide	N2	median.TOF	32.5156937107511
etoposide	QX87	median.TOF	4.98567299956777
etoposide	QX359	median.TOF	22.1586117394286
etoposide	QX399	median.TOF	-29.2101009242373
etoposide	QX305	median.TOF	19.9104081212383
etoposide	QX363	median.TOF	-40.3978369193185
etoposide	QX445	median.TOF	-26.0819801507803
etoposide	QX524	median.TOF	53.457235569823
etoposide	QX252	median.TOF	-24.1760612486921
etoposide	QX446	median.TOF	34.7222459254147
etoposide	QX515	median.TOF	-11.7004797140749
etoposide	QX431	median.TOF	-25.9222553847014
etoposide	QX440	median.TOF	28.6265815460643
etoposide	QX423	median.TOF	-23.189275222474
etoposide	QX122	median.TOF	19.1545927750667
etoposide	QX455	median.TOF	-24.7645401008034
etoposide	QX277	median.TOF	4.81833650550746
etoposide	QX551	median.TOF	-13.2625306186225
etoposide	QX289	median.TOF	-20.040754947996
etoposide	QX458	median.TOF	30.4216126128393
etoposide	QX123	median.TOF	-43.0351527021955
etoposide	QX110	median.TOF	16.2486738729785
etoposide	QX345	median.TOF	17.380387410055
etoposide	QX555	median.TOF	12.891591901656
etoposide	QX285	median.TOF	-31.9751112798289
etoposide	QX241	median.TOF	-6.59160136094262
etoposide	CB4856	median.TOF	-31.5707756591793
etoposide	QX357	median.TOF	6.12457206388336
etoposide	QX489	median.TOF	-16.1760612486921
etoposide	QX533	median.TOF	-41.5707756591793
etoposide	QX330	median.TOF	-17.256928372822
etoposide	QX512	median.TOF	-24.6948774682744
etoposide	QX542	median.TOF	-0.657245029109708
etoposide	QX8	median.TOF	44.1209793002638
etoposide	QX460	median.TOF	-7.26253061862246
etoposide	QX564	median.TOF	3.5757351331177
etoposide	QX106	median.TOF	6.4892657631873
etoposide	QX572	median.TOF	-43.256928372822
etoposide	QX6	median.TOF	28.4180198492197
etoposide	QX287	median.TOF	-41.7813468382048
etoposide	QX258	median.TOF	-14.0727851413603
amsacrine	QX89	f.L1	-0.0321674713500841
amsacrine	QX184	f.L1	0.0160681725107801
amsacrine	QX297	f.L1	-0.033154314271963
amsacrine	QX267	f.L1	-0.0720456823068467
amsacrine	QX218	f.L1	-0.00457193310529685
amsacrine	QX137	f.L1	0.026023227205625
amsacrine	QX364	f.L1	-0.0224720252907948
amsacrine	QX112	f.L1	0.0120336765303227
amsacrine	QX250	f.L1	0.0971685183794313
amsacrine	N2	f.L1	0.0461933325271766
amsacrine	QX299	f.L1	-0.0231399276141325
amsacrine	QX198	f.L1	0.0122277406636189
amsacrine	QX311	f.L1	0.0494335680683805
amsacrine	QX358	f.L1	0.0200936473560252
amsacrine	QX486	f.L1	-0.0245727854621127
amsacrine	QX511	f.L1	0.0853585127001101
amsacrine	QX174	f.L1	0.0802579851946105
amsacrine	QX172	f.L1	0.0514240563412921
amsacrine	QX314	f.L1	-0.00393027004416557
amsacrine	QX92	f.L1	-0.0308167720638658
amsacrine	QX565	f.L1	-0.0109237675174063
amsacrine	QX313	f.L1	0.0296496187458992
amsacrine	QX114	f.L1	0.00966912614280223
amsacrine	QX76	f.L1	0.012607251232785
amsacrine	QX72	f.L1	0.108978908330331
amsacrine	QX304	f.L1	-0.0382072223711849
amsacrine	QX448	f.L1	0.0807910250105868
amsacrine	QX97	f.L1	0.303471273036017
amsacrine	QX557	f.L1	0.0271538435706516
amsacrine	QX57	f.L1	0.0310668599577693
amsacrine	QX401	f.L1	-0.0301251656699817
amsacrine	QX468	f.L1	-0.0397664299474094
amsacrine	CB4856	f.L1	0.0399672297739258
amsacrine	QX243	f.L1	-0.0287449024738753
amsacrine	QX417	f.L1	0.0118385778630359
amsacrine	QX2	f.L1	0.0917959802813341
amsacrine	QX503	f.L1	-0.0492310075965219
amsacrine	QX451	f.L1	-0.0554639446018547
amsacrine	QX453	f.L1	-0.051549411382653
amsacrine	QX416	f.L1	-0.0615423714123512
amsacrine	QX561	f.L1	-0.0245697082516904
amsacrine	QX403	f.L1	-0.0773097402654331
amsacrine	QX475	f.L1	-0.0301734541464396
amsacrine	QX77	f.L1	-0.0468980534460037
amsacrine	QX437	f.L1	-0.0303151789888584
amsacrine	QX382	f.L1	-0.02752487256404
amsacrine	QX352	f.L1	-0.0162276672123736
amsacrine	QX108	f.L1	0.0118026647208948
amsacrine	QX132	f.L1	0.00874752660159498
amsacrine	QX51	f.L1	-0.00734178634839084
amsacrine	QX420	f.L1	-0.0171126506015252
amsacrine	QX418	f.L1	0.178720202325728
amsacrine	QX426	f.L1	0.0360900494607607
amsacrine	QX278	f.L1	-0.0200637753338017
amsacrine	QX506	f.L1	-0.0157535233149343
amsacrine	QX37	f.L1	0.140125465666183
amsacrine	QX529	f.L1	-0.0398277844816175
amsacrine	CB4856	f.L1	-0.0149064091955838
amsacrine	QX538	f.L1	-0.0296166953493665
amsacrine	QX553	f.L1	0.0224744157755213
amsacrine	QX245	f.L1	0.0158291491825003
amsacrine	QX487	f.L1	0.00766771973458564
amsacrine	N2	f.L1	0.100059874610275
amsacrine	QX306	f.L1	0.0704783243482507
amsacrine	QX491	f.L1	-0.0259252010833622
amsacrine	QX279	f.L1	-0.00471769328995095
amsacrine	QX153	f.L1	-0.018819553043038
amsacrine	QX315	f.L1	-0.0617442299346065
amsacrine	QX521	f.L1	-0.0213436490318808
amsacrine	QX492	f.L1	0.076422250532515
amsacrine	QX192	f.L1	0.144863591668413
amsacrine	QX91	f.L1	0.0921131701148006
amsacrine	QX456	f.L1	-0.0116714553579118
amsacrine	QX166	f.L1	-0.0241757529608415
amsacrine	QX413	f.L1	-0.0426862078640105
amsacrine	QX563	f.L1	-0.100239959370542
amsacrine	QX15	f.L1	-0.0170324892883922
amsacrine	QX49	f.L1	0.00465032228030656
amsacrine	QX465	f.L1	-0.0151725742450513
amsacrine	QX58	f.L1	0.00195918539658245
amsacrine	QX372	f.L1	-0.0285862326502161
amsacrine	QX449	f.L1	-0.0334180424282575
amsacrine	QX20	f.L1	0.015614109879016
amsacrine	QX334	f.L1	0.234309458387304
amsacrine	QX378	f.L1	-0.00883605994223174
amsacrine	QX442	f.L1	-0.0191538980693648
amsacrine	QX497	f.L1	-0.021769849905396
amsacrine	QX383	f.L1	-0.0095467088274334
amsacrine	QX435	f.L1	-0.0292747183853927
amsacrine	QX371	f.L1	-0.00831509312200638
amsacrine	QX540	f.L1	-0.0161456514567944
amsacrine	QX321	f.L1	-0.0506692374274411
amsacrine	QX336	f.L1	-0.00886201870196842
amsacrine	QX333	f.L1	-0.0481208544868191
amsacrine	QX213	f.L1	-0.0376325926994445
amsacrine	QX17	f.L1	-0.00140254102561557
amsacrine	QX270	f.L1	1.03096777372456e-06
amsacrine	QX33	f.L1	0.031661059570297
amsacrine	QX55	f.L1	-0.0348599344922506
amsacrine	QX432	f.L1	-0.00710015008766003
amsacrine	QX98	f.L1	0.0072787956983813
amsacrine	QX187	f.L1	-0.0565843458584475
amsacrine	QX42	f.L1	-0.0241391868134711
amsacrine	QX220	f.L1	0.00760036148621539
amsacrine	QX204	f.L1	0.0267146271512916
amsacrine	QX332	f.L1	-0.0714007703565581
amsacrine	QX254	f.L1	0.00833108255772133
amsacrine	QX421	f.L1	-0.0890652250927146
amsacrine	QX406	f.L1	-0.0232257732304999
amsacrine	QX88	f.L1	-0.0235341667402763
amsacrine	QX528	f.L1	0.141369454966304
amsacrine	QX127	f.L1	-0.0327136472718839
amsacrine	QX275	f.L1	-0.0408053450155995
amsacrine	QX484	f.L1	-0.0488663841024086
amsacrine	QX597	f.L1	0.0421583900580058
amsacrine	QX75	f.L1	-0.0861078211090763
amsacrine	QX438	f.L1	-0.0613200089791262
amsacrine	QX160	f.L1	0.0244324670565055
amsacrine	QX520	f.L1	-0.00407059338388566
amsacrine	QX53	f.L1	-0.034627034505519
amsacrine	QX165	f.L1	-0.0475627650919486
amsacrine	QX459	f.L1	-0.0318996337229001
amsacrine	QX63	f.L1	-0.00263781303748971
amsacrine	QX476	f.L1	-0.0516084037443416
amsacrine	QX337	f.L1	0.0228948972383253
amsacrine	QX452	f.L1	-0.03222855674424
amsacrine	QX554	f.L1	-0.0841452631927674
amsacrine	QX41	f.L1	-0.0434634042228399
amsacrine	QX175	f.L1	-0.0126429875236188
amsacrine	QX559	f.L1	-0.0368611697758854
amsacrine	QX348	f.L1	-0.0577136395899117
amsacrine	CB4856	f.L1	-0.138863162592036
amsacrine	CB4856	f.L1	-0.0311101533821298
amsacrine	QX341	f.L1	-0.0400173881492012
amsacrine	QX430	f.L1	0.0149194989227873
amsacrine	QX115	f.L1	0.00935926777578398
amsacrine	QX65	f.L1	-0.036994917236267
amsacrine	QX373	f.L1	0.0163220016048115
amsacrine	QX295	f.L1	-0.0794727104376658
amsacrine	QX104	f.L1	0.0119077299021494
amsacrine	QX429	f.L1	-0.0558205208993541
amsacrine	QX45	f.L1	-0.021801176500127
amsacrine	QX322	f.L1	-0.0518458904174923
amsacrine	QX393	f.L1	-0.0418851794603027
amsacrine	QX514	f.L1	-0.0320865088767548
amsacrine	QX386	f.L1	0.00645958714596946
amsacrine	QX85	f.L1	0.0274971307417319
amsacrine	QX326	f.L1	-0.00169581558875535
amsacrine	QX84	f.L1	0.0205798908950039
amsacrine	QX436	f.L1	-0.0164559663123156
amsacrine	QX355	f.L1	0.0193173672160481
amsacrine	QX101	f.L1	-0.00401378734999501
amsacrine	QX154	f.L1	0.00302612559113989
amsacrine	QX117	f.L1	0.0321959516570533
amsacrine	QX380	f.L1	-0.085847909555205
amsacrine	QX135	f.L1	-0.032907494308967
amsacrine	QX176	f.L1	0.104204916747843
amsacrine	QX328	f.L1	0.153797030813059
amsacrine	QX325	f.L1	-0.00989332122771953
amsacrine	QX47	f.L1	-0.02168285109319
amsacrine	QX162	f.L1	-0.0353721090570287
amsacrine	QX190	f.L1	0.0332688328823405
amsacrine	QX574	f.L1	-0.0992955348745902
amsacrine	QX16	f.L1	0.00761173046022218
amsacrine	QX360	f.L1	-0.0227099961508001
amsacrine	QX473	f.L1	-0.0803019407664381
amsacrine	QX467	f.L1	-0.00712470577968126
amsacrine	QX148	f.L1	0.158447166477652
amsacrine	QX149	f.L1	0.0217855067350416
amsacrine	QX121	f.L1	0.00756431937904841
amsacrine	QX164	f.L1	0.0142686949539955
amsacrine	QX517	f.L1	-0.015003568116081
amsacrine	QX173	f.L1	-0.0468455872601475
amsacrine	QX13	f.L1	-0.00404830165330249
amsacrine	QX253	f.L1	-0.0352756707637096
amsacrine	QX274	f.L1	0.0060259783959484
amsacrine	QX161	f.L1	-0.0350447548107016
amsacrine	QX477	f.L1	-0.0694472406325942
amsacrine	QX240	f.L1	-0.0459839311533292
amsacrine	QX349	f.L1	0.0501312500031592
amsacrine	QX66	f.L1	-0.0196630501530558
amsacrine	QX180	f.L1	-0.0281577579937246
amsacrine	QX374	f.L1	0.00321638813041735
amsacrine	QX394	f.L1	-0.000532618415858368
amsacrine	QX188	f.L1	-0.0425535706834727
amsacrine	QX242	f.L1	0.0111523739869346
amsacrine	QX62	f.L1	0.0752974966401578
amsacrine	QX244	f.L1	0.0142969431187098
amsacrine	QX474	f.L1	-0.0377443453957008
amsacrine	QX9	f.L1	0.032798097651465
amsacrine	QX207	f.L1	0.0457049286303967
amsacrine	QX293	f.L1	-0.0831426037009224
amsacrine	QX183	f.L1	0.0335521016883592
amsacrine	QX523	f.L1	-0.0704119131349246
amsacrine	QX490	f.L1	-0.0464487700212845
amsacrine	QX560	f.L1	0.0121386788415727
amsacrine	QX227	f.L1	-0.0153557135708794
amsacrine	QX11	f.L1	0.0111272271541479
amsacrine	N2	f.L1	-0.0450303974734845
amsacrine	QX26	f.L1	0.0918430649479849
amsacrine	QX134	f.L1	0.0282585967597617
amsacrine	QX83	f.L1	0.0839904049672612
amsacrine	QX376	f.L1	-0.0413196286766135
amsacrine	QX113	f.L1	-0.0391046766634348
amsacrine	QX271	f.L1	0.00620286302459031
amsacrine	QX549	f.L1	-0.0982338330540163
amsacrine	QX594	f.L1	-0.0404665341767909
amsacrine	QX118	f.L1	0.0126268438572662
amsacrine	QX531	f.L1	-0.0542256811056491
amsacrine	QX513	f.L1	-0.0502826687395655
amsacrine	QX261	f.L1	0.011407441237472
amsacrine	QX288	f.L1	-0.0546197180698622
amsacrine	QX22	f.L1	0.00769788322325023
amsacrine	N2	f.L1	0.0194060682119413
amsacrine	QX539	f.L1	0.036878162221965
amsacrine	QX181	f.L1	-0.00378382637681324
amsacrine	QX125	f.L1	0.0119548252088654
amsacrine	QX441	f.L1	0.0363192556257026
amsacrine	QX370	f.L1	0.0065901736564912
amsacrine	QX573	f.L1	0.0442557397587944
amsacrine	QX93	f.L1	-0.0802049325279499
amsacrine	QX339	f.L1	0.0199997194234597
amsacrine	QX479	f.L1	-0.0292196586980858
amsacrine	CB4856	f.L1	-0.0108752251357066
amsacrine	QX95	f.L1	-0.00291946590943855
amsacrine	QX52	f.L1	-0.00574402128423046
amsacrine	QX54	f.L1	0.0719132214631139
amsacrine	QX362	f.L1	0.0604763364694374
amsacrine	QX570	f.L1	0.375295152563279
amsacrine	QX340	f.L1	0.0528528348041593
amsacrine	QX284	f.L1	0.0121794343254762
amsacrine	QX319	f.L1	-0.0280894437035631
amsacrine	QX498	f.L1	-0.0369679544173034
amsacrine	QX434	f.L1	-0.0223835819590249
amsacrine	QX298	f.L1	0.00913657242763909
amsacrine	QX25	f.L1	-0.0683570135934209
amsacrine	QX82	f.L1	-0.0531338720941892
amsacrine	QX44	f.L1	-0.0946040162215685
amsacrine	QX483	f.L1	-0.0176728388659098
amsacrine	QX508	f.L1	-0.0794175516398864
amsacrine	QX585	f.L1	0.0604488921505055
amsacrine	QX231	f.L1	0.0658232195635097
amsacrine	QX447	f.L1	-0.0698593459043238
amsacrine	QX384	f.L1	0.0899728420806727
amsacrine	QX469	f.L1	0.222115352515072
amsacrine	QX584	f.L1	0.0474882508478392
amsacrine	QX103	f.L1	0.00730025647098623
amsacrine	QX283	f.L1	0.020213148471642
amsacrine	QX224	f.L1	0.00098883211478147
amsacrine	QX461	f.L1	0.0143397560586235
amsacrine	CB4856	f.L1	-0.00771206602609046
amsacrine	QX335	f.L1	-0.0665556356814524
amsacrine	CB4856	f.L1	0.0341361007090012
amsacrine	QX202	f.L1	0.0249507408377212
amsacrine	QX309	f.L1	-0.0367141106605766
amsacrine	QX580	f.L1	0.0141431257853239
amsacrine	QX296	f.L1	-0.00634598441299504
amsacrine	QX409	f.L1	-0.018158417676038
amsacrine	QX365	f.L1	0.00870048117424032
amsacrine	QX237	f.L1	-0.015605338946419
amsacrine	QX4	f.L1	-0.0556491343262815
amsacrine	QX316	f.L1	-0.032619614775096
amsacrine	QX343	f.L1	-0.0457697093057076
amsacrine	QX369	f.L1	-0.0355529565913956
amsacrine	QX189	f.L1	-0.0468606172873039
amsacrine	QX43	f.L1	-0.0126783628057757
amsacrine	QX427	f.L1	0.00123292252415632
amsacrine	QX347	f.L1	-0.0115320011941027
amsacrine	QX291	f.L1	0.0306212422790731
amsacrine	QX194	f.L1	-0.00154337268265592
amsacrine	QX102	f.L1	-0.0648860588778426
amsacrine	QX12	f.L1	0.0170380194215941
amsacrine	QX248	f.L1	-0.00691813166840543
amsacrine	QX107	f.L1	-0.0357338861747063
amsacrine	QX90	f.L1	-0.0286849423894063
amsacrine	QX79	f.L1	0.01536997833606
amsacrine	QX28	f.L1	0.198195561307525
amsacrine	QX196	f.L1	-0.0480279779267526
amsacrine	QX80	f.L1	0.0504017992585404
amsacrine	QX367	f.L1	-0.0540780311205233
amsacrine	QX525	f.L1	-0.0286115420039103
amsacrine	QX377	f.L1	0.0118813462050644
amsacrine	QX500	f.L1	-0.0306629378135786
amsacrine	QX405	f.L1	-0.0258531467702332
amsacrine	QX470	f.L1	-0.0430548244107524
amsacrine	QX323	f.L1	-0.0605423923405317
amsacrine	QX236	f.L1	0.130998117894803
amsacrine	QX286	f.L1	-0.0185982741445629
amsacrine	QX407	f.L1	-0.00644021705503238
amsacrine	QX495	f.L1	-0.0326308155800785
amsacrine	QX14	f.L1	-0.0449609196369372
amsacrine	QX338	f.L1	-0.0188667705384419
amsacrine	QX163	f.L1	-0.0639099403378648
amsacrine	CB4856	f.L1	-0.0763655541035008
amsacrine	QX312	f.L1	-0.00386966437198705
amsacrine	QX598	f.L1	-0.01187366471877
amsacrine	QX331	f.L1	0.0251327622600309
amsacrine	QX133	f.L1	-0.0289538117678572
amsacrine	QX472	f.L1	-0.0161788996328617
amsacrine	QX556	f.L1	-0.0102706192660628
amsacrine	QX178	f.L1	0.0643184478244342
amsacrine	QX392	f.L1	-0.0211825670715095
amsacrine	QX412	f.L1	-0.0644827894408795
amsacrine	QX390	f.L1	0.000635552513946068
amsacrine	QX78	f.L1	0.0173211896302357
amsacrine	QX280	f.L1	0.0265924255135223
amsacrine	QX310	f.L1	-0.0576535777063948
amsacrine	N2	f.L1	0.0693004722566324
amsacrine	QX396	f.L1	-0.0510924949757244
amsacrine	QX400	f.L1	-0.0544491425742902
amsacrine	QX366	f.L1	0.0321136291705154
amsacrine	QX527	f.L1	0.0274928505955703
amsacrine	QX294	f.L1	-0.00473563833696254
amsacrine	QX368	f.L1	-0.0868949177501835
amsacrine	QX327	f.L1	-0.0544988284829381
amsacrine	QX356	f.L1	-0.0509886071067537
amsacrine	QX48	f.L1	0.0158136666495487
amsacrine	QX387	f.L1	0.00651861274002956
amsacrine	QX263	f.L1	0.0112756344640174
amsacrine	QX226	f.L1	0.0215183205929542
amsacrine	QX329	f.L1	-0.0575573859427103
amsacrine	QX38	f.L1	0.0131564601024924
amsacrine	QX324	f.L1	-0.00207667072102089
amsacrine	QX10	f.L1	0.0151837851312898
amsacrine	QX71	f.L1	0.0771944537702946
amsacrine	QX478	f.L1	-0.0028410590883906
amsacrine	QX346	f.L1	0.00987696909501984
amsacrine	QX596	f.L1	0.00305852825458889
amsacrine	N2	f.L1	-0.0623621140070651
amsacrine	QX381	f.L1	0.0528666445082768
amsacrine	QX457	f.L1	-0.0256048607940962
amsacrine	QX136	f.L1	0.00445076877046755
amsacrine	QX61	f.L1	0.0682537869228701
amsacrine	N2	f.L1	0.01760311628337
amsacrine	QX144	f.L1	0.0274551279309339
amsacrine	QX281	f.L1	0.00380843275318868
amsacrine	QX300	f.L1	-0.0071533384489371
amsacrine	QX264	f.L1	-0.0148197904753211
amsacrine	QX5	f.L1	0.0297768226914268
amsacrine	QX64	f.L1	-0.0310156004423539
amsacrine	QX159	f.L1	0.118485408270658
amsacrine	QX391	f.L1	-0.0275659807076414
amsacrine	QX379	f.L1	0.0247072074957139
amsacrine	QX583	f.L1	-0.00700567494724134
amsacrine	QX501	f.L1	-0.0203066761788425
amsacrine	QX353	f.L1	0.0135925429763451
amsacrine	QX124	f.L1	-0.0279606730540534
amsacrine	QX471	f.L1	-0.069222899906556
amsacrine	QX129	f.L1	0.0526758337271997
amsacrine	QX424	f.L1	-0.00597740184726366
amsacrine	N2	f.L1	-0.0167842607851435
amsacrine	QX464	f.L1	-0.110998752700841
amsacrine	QX120	f.L1	0.0222982862245477
amsacrine	QX410	f.L1	-0.0379488837120577
amsacrine	QX40	f.L1	-0.0012804846884952
amsacrine	QX302	f.L1	-0.00433727856587359
amsacrine	QX303	f.L1	-0.00337428862193137
amsacrine	QX234	f.L1	-0.00124495021398033
amsacrine	QX68	f.L1	-0.0323828848984804
amsacrine	QX320	f.L1	-0.0396344143354719
amsacrine	QX138	f.L1	-0.0338651968242789
amsacrine	QX73	f.L1	0.100630307845416
amsacrine	QX398	f.L1	-0.0367995485044643
amsacrine	QX203	f.L1	-0.0401927712871515
amsacrine	QX395	f.L1	0.0148816843863156
amsacrine	QX443	f.L1	0.0181530047284163
amsacrine	QX59	f.L1	0.38937107071325
amsacrine	QX70	f.L1	0.0111968302078377
amsacrine	QX545	f.L1	-0.0137663646574841
amsacrine	QX587	f.L1	0.0490681319217252
amsacrine	QX34	f.L1	-0.0170543444872888
amsacrine	QX276	f.L1	-0.0599854112599525
amsacrine	QX493	f.L1	-0.0202517591818183
amsacrine	N2	f.L1	0.0576587324493022
amsacrine	QX87	f.L1	-0.0396600021439165
amsacrine	QX359	f.L1	-0.037746918375875
amsacrine	QX399	f.L1	-0.00353131640045966
amsacrine	QX305	f.L1	-0.0306084607148432
amsacrine	QX363	f.L1	0.0282047324250022
amsacrine	QX445	f.L1	0.0218419400355834
amsacrine	QX524	f.L1	0.0477025721943441
amsacrine	QX252	f.L1	-0.0125963329546899
amsacrine	QX446	f.L1	0.0293161317205935
amsacrine	QX515	f.L1	-0.0310803862402713
amsacrine	QX431	f.L1	-0.00428902801246118
amsacrine	QX440	f.L1	0.051069731784708
amsacrine	QX423	f.L1	0.036952212501252
amsacrine	QX122	f.L1	-0.0865857604062627
amsacrine	QX455	f.L1	-0.0202865917917563
amsacrine	QX216	f.L1	0.00161721356510507
amsacrine	QX551	f.L1	0.0108663733701396
amsacrine	QX289	f.L1	0.0524223039905372
amsacrine	QX458	f.L1	-0.082457235497318
amsacrine	QX123	f.L1	-0.0213274534140112
amsacrine	QX110	f.L1	0.238416058249906
amsacrine	QX345	f.L1	-0.0282085126393058
amsacrine	QX555	f.L1	-0.0316520666867292
amsacrine	QX285	f.L1	-0.0174968255531457
amsacrine	QX241	f.L1	-0.0466288829664552
amsacrine	CB4856	f.L1	-0.0945372703661853
amsacrine	QX357	f.L1	0.0497933646390125
amsacrine	QX489	f.L1	0.0810188996159383
amsacrine	QX533	f.L1	-0.0217734256188946
amsacrine	QX330	f.L1	0.0527706630297318
amsacrine	QX512	f.L1	-0.0627314557078889
amsacrine	QX542	f.L1	-0.0317562786337047
amsacrine	QX8	f.L1	-0.0792455636821574
amsacrine	QX460	f.L1	-0.0274037331538919
amsacrine	QX268	f.L1	-0.00024042464518464
amsacrine	QX564	f.L1	-0.0602464692727147
amsacrine	QX106	f.L1	0.0550386990335828
amsacrine	QX572	f.L1	0.138125123372368
amsacrine	QX6	f.L1	0.0454480957555991
amsacrine	QX287	f.L1	0.0276918953361116
amsacrine	QX258	f.L1	-0.0260870531685472
